# Supplementary material for: Boosting chemoselective reduction of 4-nitrostyrene via photoinduced energetic electrons from in situ formed Cu nanoparticles on carbon dots
Source: Royal Society of Chemistry journal article supplement (doi:10.1039/d1gc00409c), 2021-01-01
Supplement: d1gc00409c1.pdf [file d1gc00409c1.pdf]

## Supplementary Information

### **Boosting chemoselective reduction of 4-nitrostyrene via photoinduced energetic electrons from in-situ formed Cu nanoparticles on carbon dots**

Yuqi Ren,<sup>a‡</sup> Caihong Hao,<sup>a‡</sup> Qing Chang,<sup>a</sup> Ning Li,<sup>a</sup> Jinlong Yang,<sup>a,b</sup> Shengliang Hu<sup>a\*</sup>

<sup>a</sup> *Research Group of New Energy Materials and Devices, North University of China, Taiyuan 030051, P. R. China.*

<sup>b</sup> *State Key Laboratory of New Ceramics and Fine Processing, Tsinghua University, Beijing 100084, P. R. China.*

‡ These authors contributed equally to this work.

\*Corresponding author E-mail: [hsliang@yeah.net](mailto:hsliang@yeah.net) (S. Hu)

## 1. Experimental Section

**1.1 Materials and reagents.** All of chemicals including 4-nitrostyrene (4-NS), 4-aminostyrene (4-AS), 4-nitroethylbenzene (4-NE), 4-ethylbenzenamine (4-EA), 4-nitrophenol, copper (II) acetylacetonate ( $\text{Cu}(\text{acac})_2$ ), N, N-Dimethylformamide (DMF), formic acid (88 v/v%),  $\text{H}_2\text{O}_2$  (30 v/v%), ammonia borane (AB), and  $\text{NaBH}_4$  were purchased from Aladdin and they were directly used without further purification in our experiments. All aqueous solutions in the experiment were prepared using ultrapure water.

**1.2 Preparation of CDs.** Our used CDs were prepared according to our previous method<sup>1</sup>. Typically, coal pitch powder (200 mg) was added into the mixed solution of formic acid (30 mL) and  $\text{H}_2\text{O}_2$  (3 mL), then the resultant solution was stirred for 20 h at room temperature. Subsequently, the supernatant liquid containing CDs was retained by centrifugation for 30 min at 10000 rpm. After removing the solvent, the powder of CDs was obtained finally.

**1.3 Preparation of CDs@CuNPs.** In a 50 mL beaker, 80 mg of  $\text{Cu}(\text{acac})_2$ , 80 mg of CDs, and 6 ml of  $\text{H}_2\text{O}$  were added into 24 mL of DMF. After stirring for 30 min, the homogeneous black solution was transferred into a Teflon-lined reactor and heated from room to 160 °C and kept for 2 h. After cooling to room temperature, the precipitates were collected by centrifugation. The collected precipitates were dried in a vacuum oven at 60 °C for 12 h after washing several times with ethanol and water, respectively. The comparison sample of  $\text{Cu}_2\text{O}$  was prepared following the same recipe and processes as for CDs@CuNPs but without adding CDs.

**1.4 Sample characterization.** Absorption spectra of samples were collected on a Shimadzu UV-2550 UV-Vis spectrometer. X-ray diffraction (XRD) patterns of different samples were obtained using a Bruker D8 ADVANCE powder diffractometer at Cu K $\alpha$  with a scanning rate of 2° min<sup>-1</sup> in the 2 $\theta$  range of 5–90°. TEM and HRTEM were performed on a FEI Tecnai G2 F20 microscope with a field-emission gun operating at 200 kV. XPS data of all samples were collected using a Kratos AXIS 165 multitechnique electron spectrometer with an Al K $\alpha$  X-ray source for determining the composition and chemical bonding configurations.

**1.5 Electrochemical measurements.** Electrochemical measurements were conducted in a three-electrode electrochemical cell system. All working electrodes were fabricated through coating ethanol suspension of the samples onto indium tin oxide (ITO) glass electrodes, then evaporating the solvent in a vacuum at 60 °C. The electrolyte solution was made using 0.5 M Na<sub>2</sub>SO<sub>4</sub>. A Platinum plate and Ag/AgCl reference electrode acted as the counter electrode and reference electrode. All of the data were collected on a Bio-Logic (SP 120) electrochemical workstation.

**1.6 Catalytic reaction test.** Typically, 3 mg of sample powder and 20 mL of aqueous solution of the reaction substrate (0.168 mM) were added into a quartz reactor placed on a magnetic stirrer and thermostatted at 25 °C. After dissolving the powder completely, 2 mg of AB and 4 mg of EDTA-2Na as a sacrificial reagent was then put into the reactor. The sealed reactor was irradiated under a Xe lamp with a cut420 filter attached ( $\lambda \geq 420$  nm, 100 mW·cm<sup>-2</sup>). The characteristic absorption of the products was monitored using UV–Vis spectrophotometry by taking aliquots at regular intervals. The

concentrations of the products ( $C$ ) were obtained using the Lambert beer's law:

$$A = \varepsilon \times b \times C$$

where  $A$  is absorbance which can be measured;  $\varepsilon$  is the molar extinction coefficient of the products;  $b$  is the path length of light ( $b=1$  cm). Finally, the product contents were further confirmed by GC-MS (gas chromatography with a Thermo Finnigan chromatograph equipped with a flame ionization detector and a DB-WAX capillary column with nitrogen as the carrier gas).

## 2. Supporting results

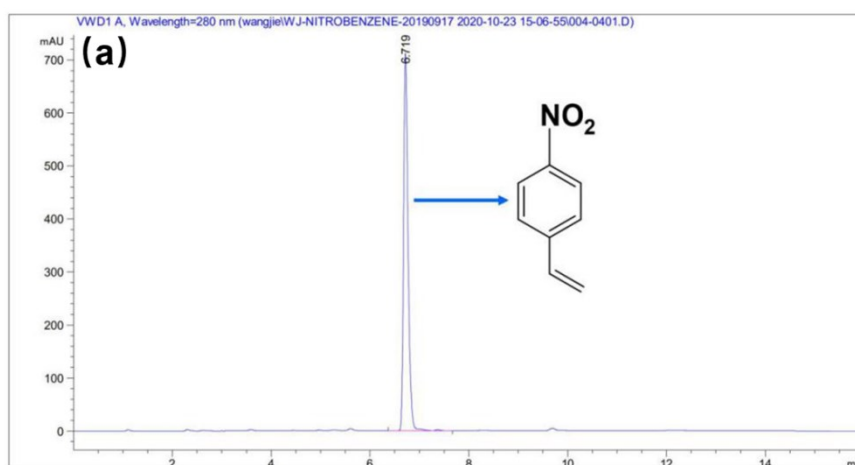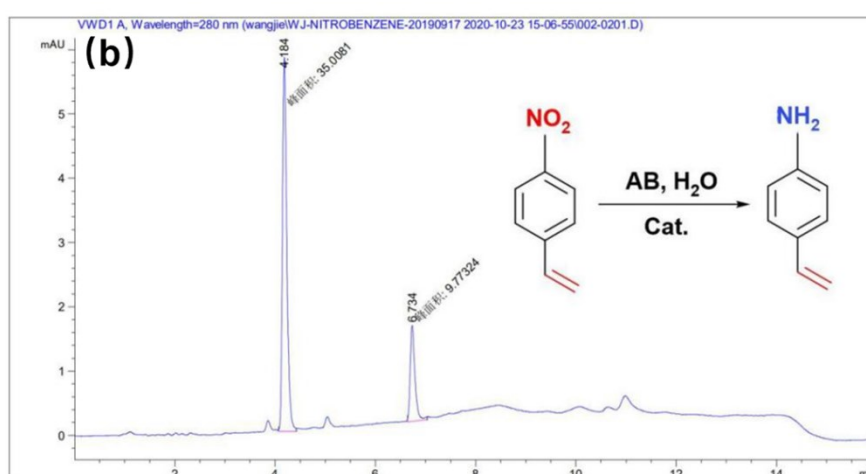

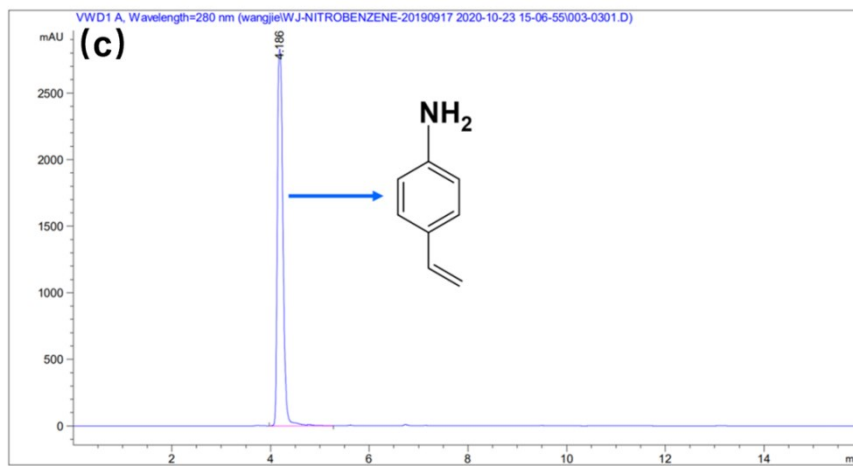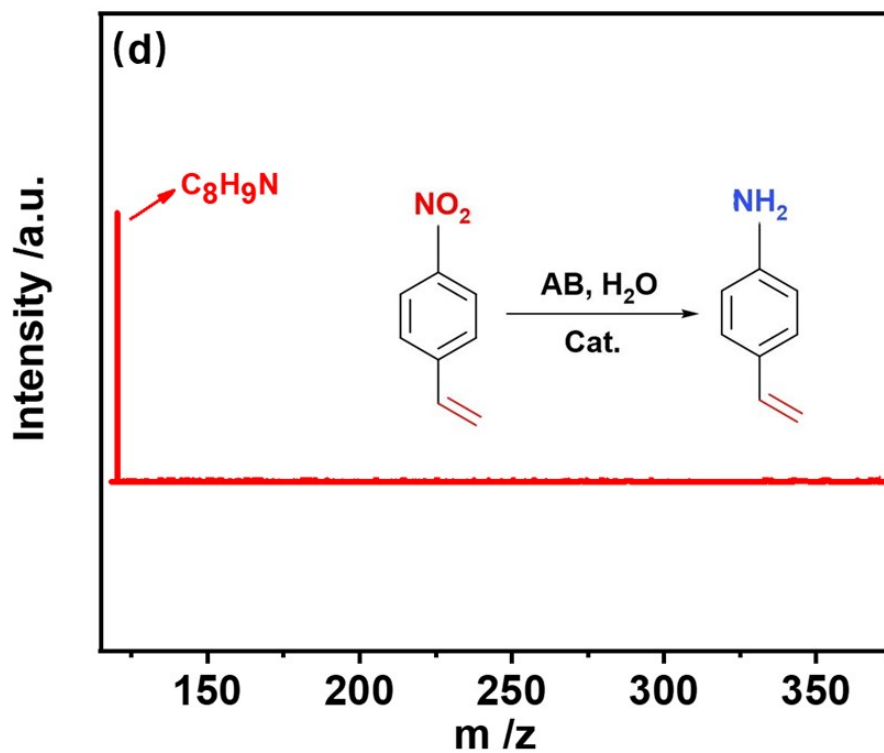

Figure S1. (a) GC spectrum of 4-NS; (b) GC spectrum of the product after catalytic reaction for 8 min; (c) GC spectrum of the product after catalytic reaction for 20 min; (d) MS spectrum of the product after catalytic reaction for 20 min.

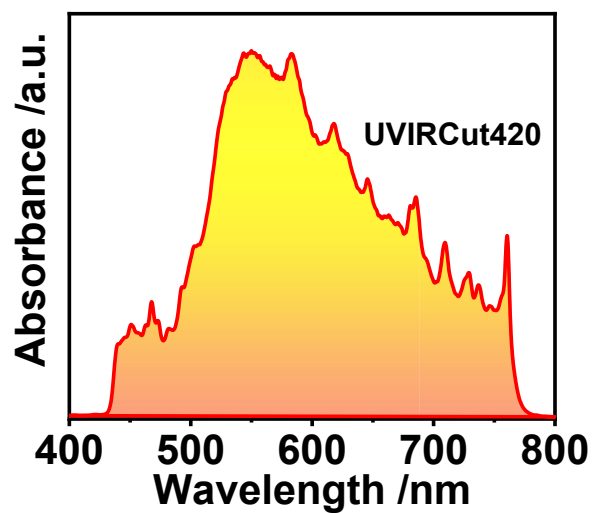

Figure S2. Visible light spectrum obtained by cut420 filter

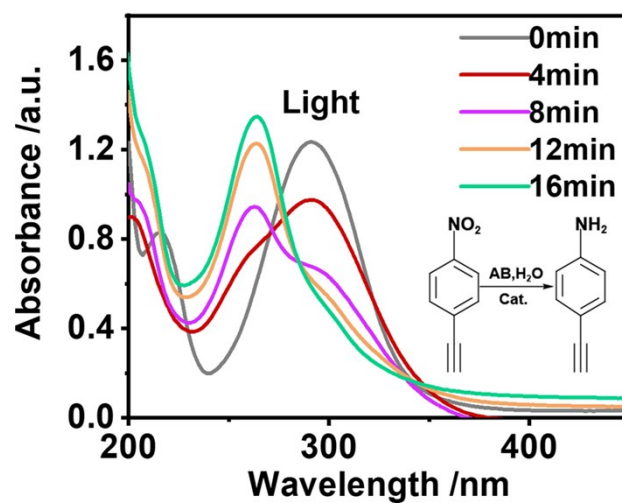

Figure S3. UV-Vis. absorption spectra of 4-nitrophenylacetylene vs. time in the presence of CDs@CuNPs (3 mg) and AB (2 mg) under visible light irradiation

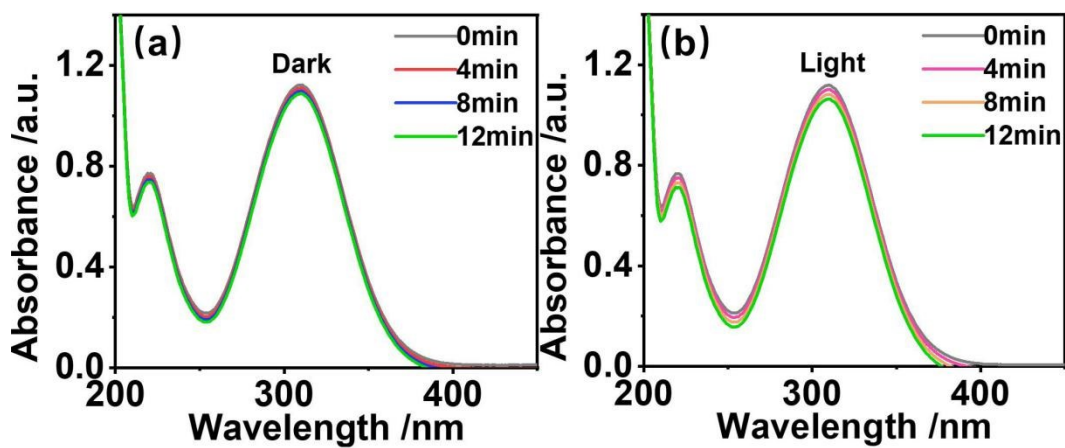

**Figure S4.** UV-Vis. absorption spectra of 4-NS vs. time in the presence of CDs@CuNPs but no addition of AB on dark condition (a) and on illumination (b)

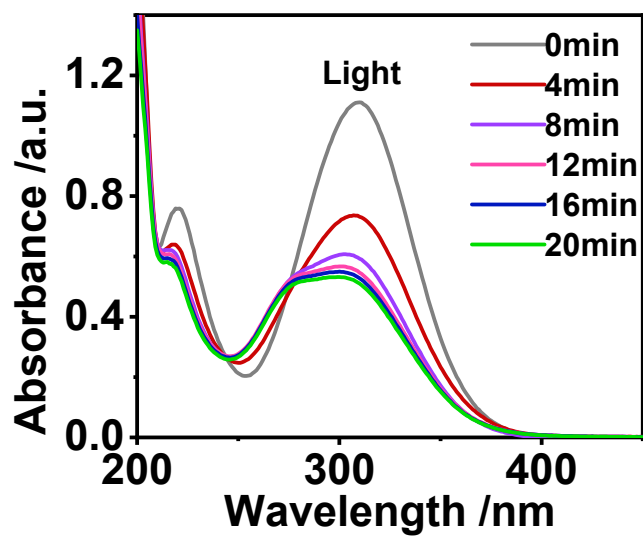

**Figure S5.** UV-Vis absorption spectra of 4-NS vs. time in the presence of CDs@CuNPs and AB in a mixed solution of water and ethanol

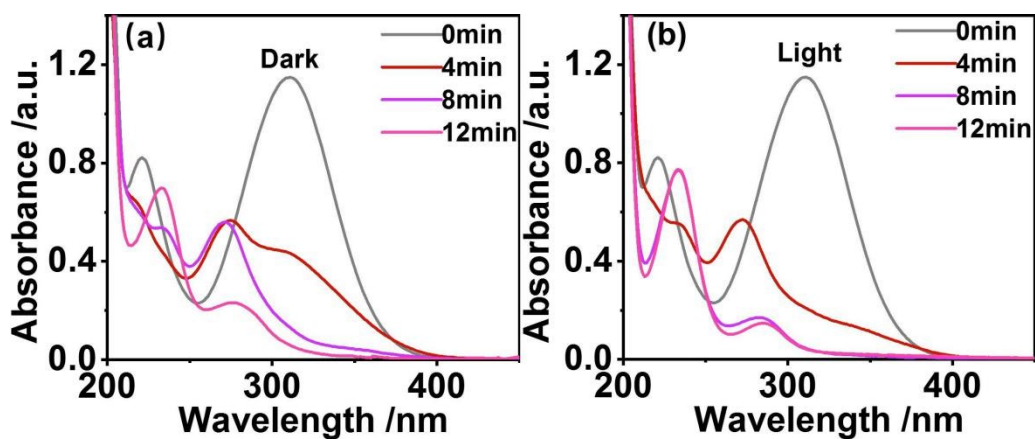

**Figure S6.** UV-Vis absorption spectra of 4-NS vs. time in the presence of CDs@CuNPs (3 mg) and excessive AB (10 mg) on dark condition (a) and on illumination (b).

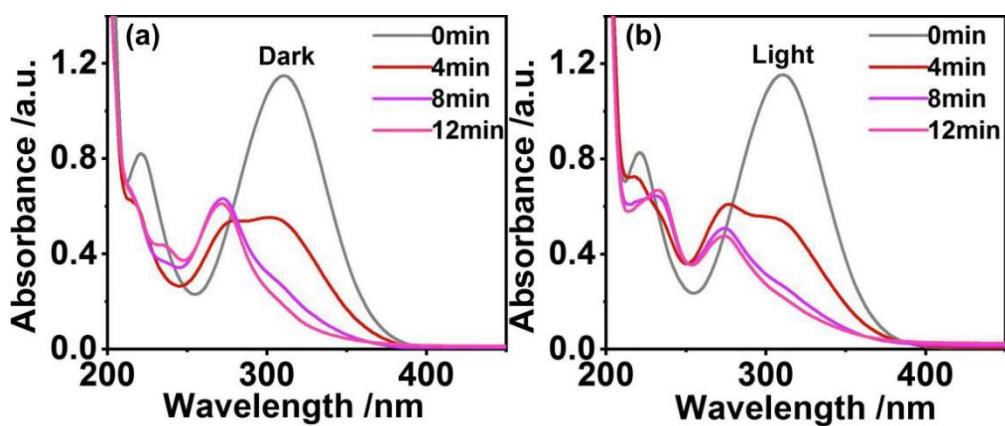

**Figure S7.** UV-Vis absorption spectra of 4-NS vs. time in the presence of CDs@CuNPs (3 mg) and NaBH<sub>4</sub> (2 mg) on dark condition (a) and on illumination (b).



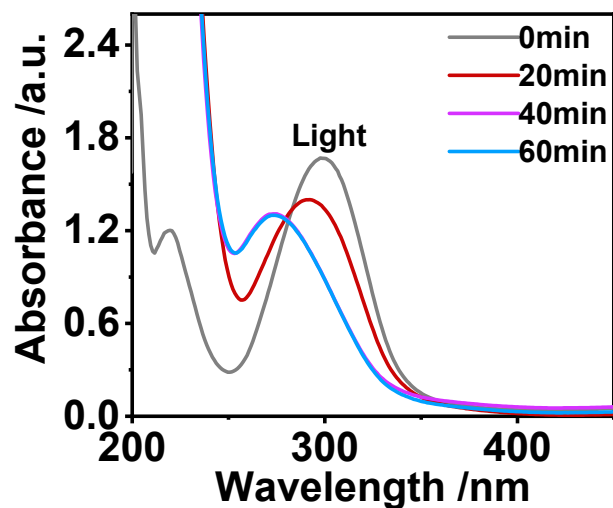

**Figure S8.** UV-Vis. absorption spectra of 4-NS vs. time in the presence of CDs@CuNPs (3 mg) and  $\text{N}_2\text{H}_4 \cdot \text{H}_2\text{O}$  (2  $\mu\text{L}$ ) under visible light irradiation

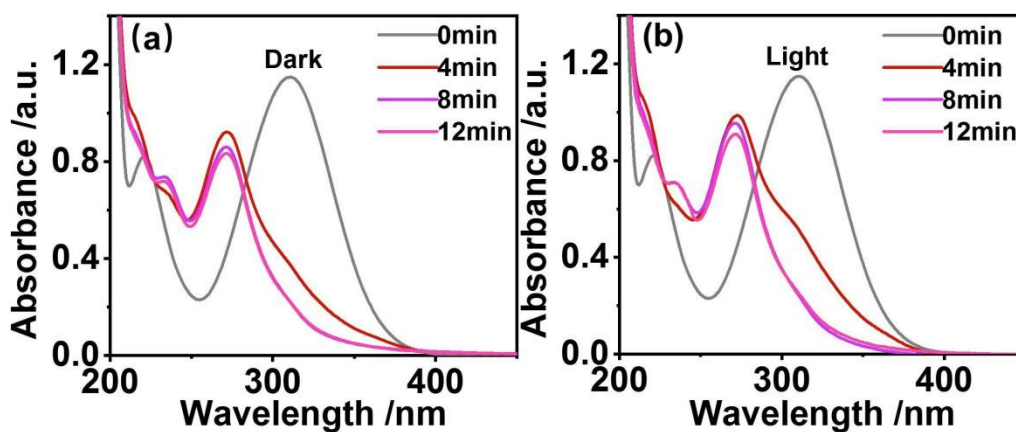

**Figure S9.** UV-Vis absorption spectra of 4-NS vs. time in the presence of  $\text{Cu}_2\text{O}$  (3 mg) and  $\text{NaBH}_4$  (2 mg) on dark condition (a) and on illumination (b).

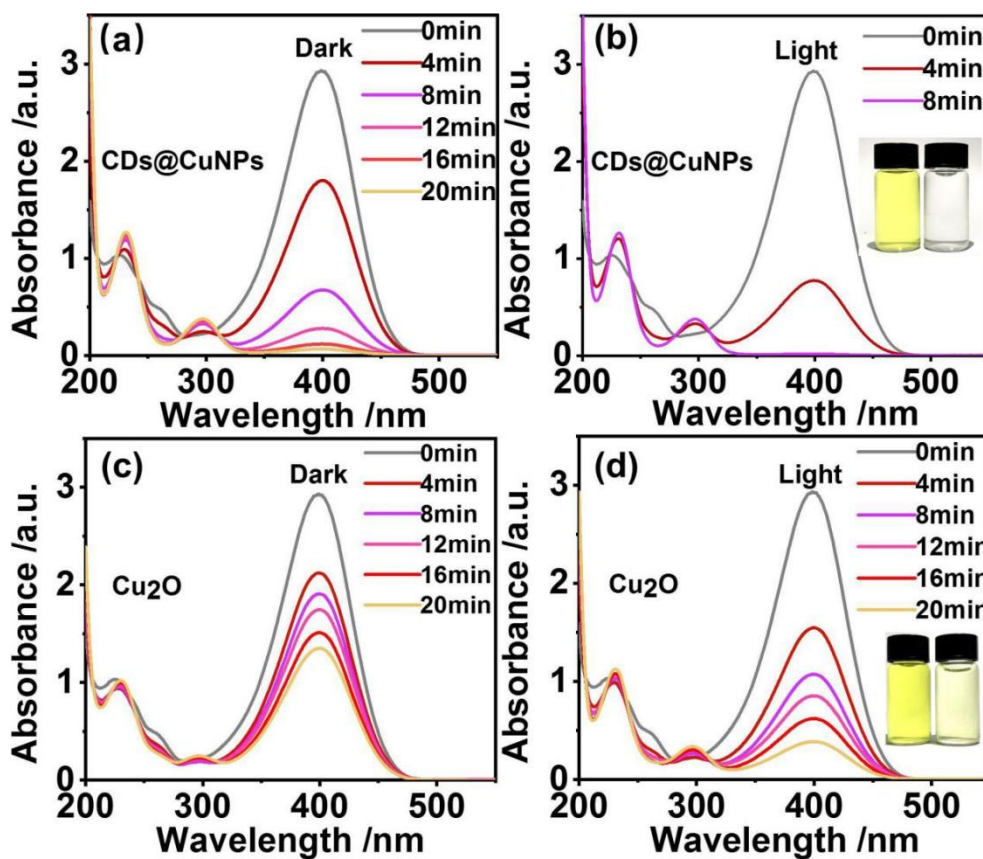

**Figure S10.** (a and b) The evolution of UV-Vis absorption spectra of 4-NP solution over CDs@CuNPs with time on dark condition (a) and on illumination (b); (c and d) The evolution of UV-Vis absorption spectra of 4-NP solution over Cu<sub>2</sub>O with time on dark condition (c) and on illumination (d). The inset in (b) and (d) showing the photos of the 4-NP solution before and after catalytic reduction.

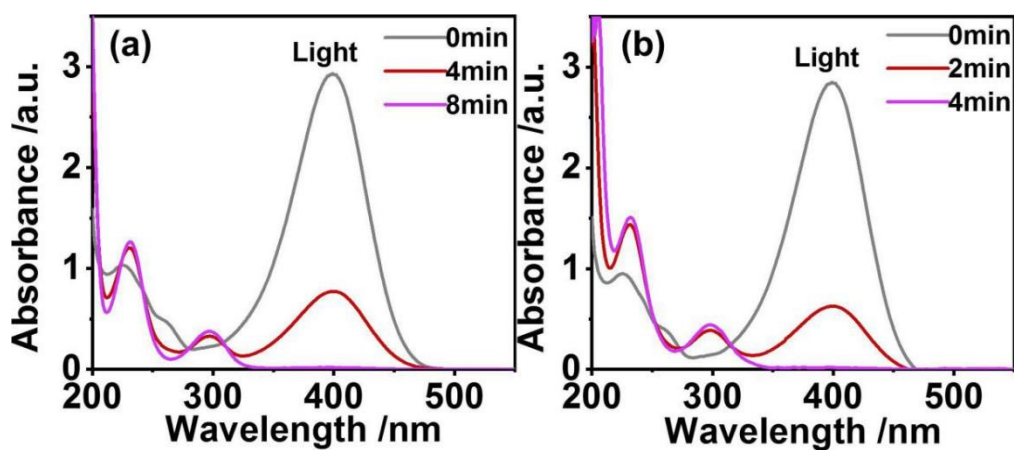

**Figure S11.** UV-Vis absorption spectra of 4-NP solution over CDs@CuNPs in the presence of AB (a) and NaBH<sub>4</sub> (b).

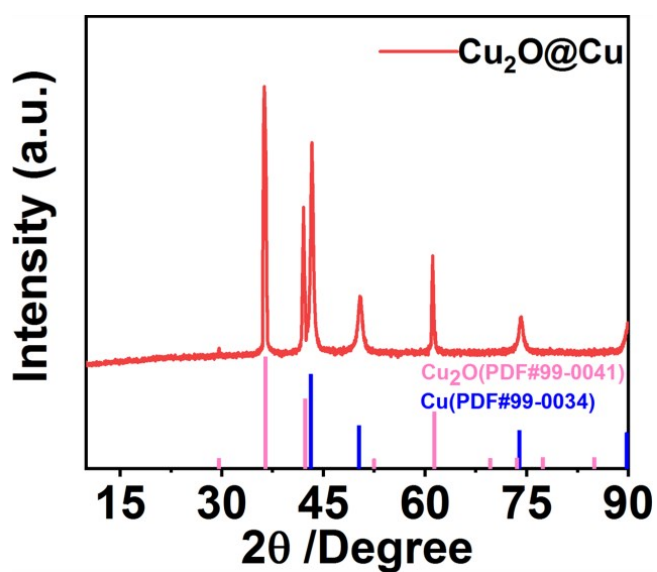

**Figure S12.** XRD pattern of Cu<sub>2</sub>O@Cu.

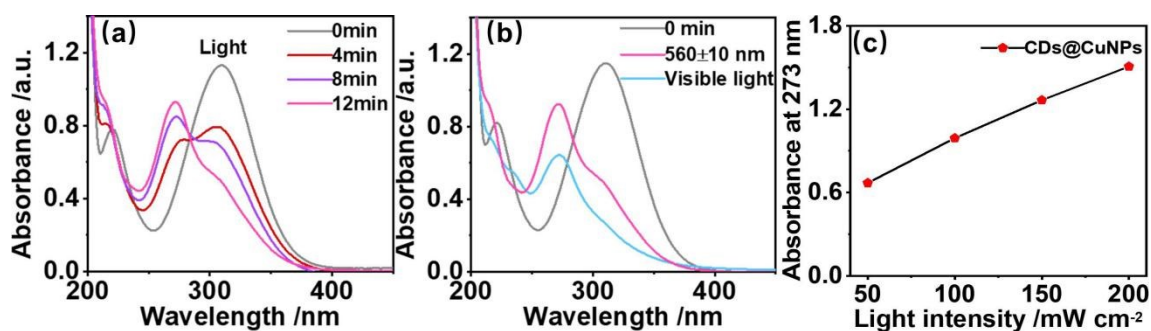

**Figure S13.** (a) UV-Vis absorbance spectra for the selective reduction of 4-NS irradiated with the fixed excitation wavelength at  $560 \pm 10$  nm without adding EDTA-2Na hole scavenger. (b) The comparison of UV-Vis absorbance spectra for CDs@CuNPs irradiated with the fixed excitation wavelength at  $560 \pm 10$  nm and visible light. (c) The dependence of conversion rate of 4-NS to 4-AS on the intensity of fixed wavelength at  $560 \pm 10$  nm.

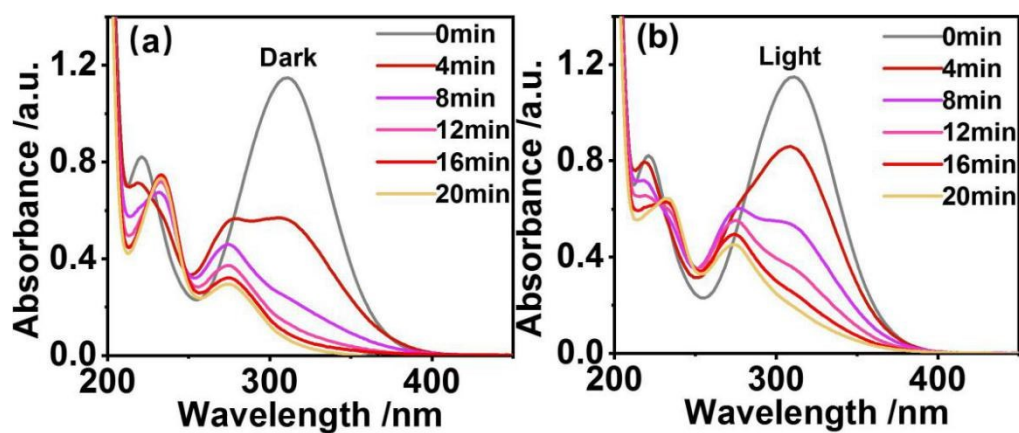

**Figure S14.** UV-Vis absorption spectra of 4-NS vs. time in the presence of  $\text{Cu}_2\text{O}@Cu$  (3 mg) and AB (2 mg) on dark condition (a) and on illumination (b).

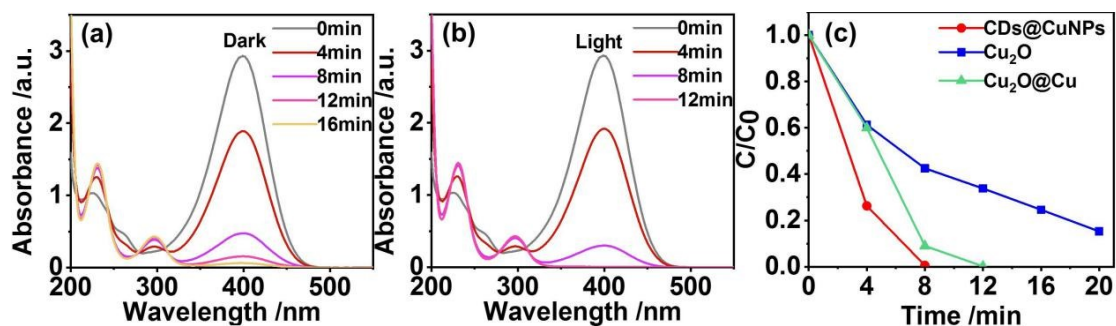

**Figure S15.** (a and b) The evolution of UV-Vis absorption spectra of 4-NP solution over Cu<sub>2</sub>O@Cu with time on dark condition (a) and on illumination (b); (c) Activity comparisons of Cu<sub>2</sub>O@CuNPs, Cu<sub>2</sub>O and Cu<sub>2</sub>O@Cu for 4-NP reduction under visible light irradiation.

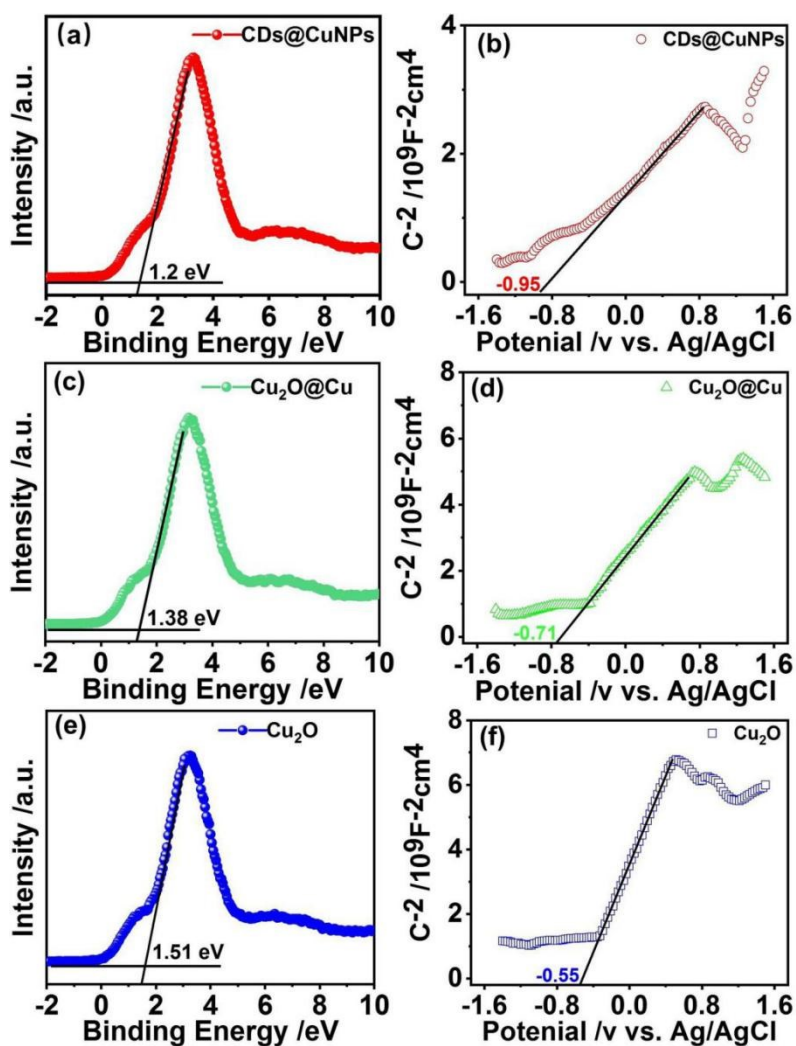

**Figure S16.** (a, c, and e) XPS valence spectra of CDs@CuNPs, Cu<sub>2</sub>O@Cu and Cu<sub>2</sub>O; (b, d, and f) MS plots of CDs@CuNPs, Cu<sub>2</sub>O@Cu and Cu<sub>2</sub>O.

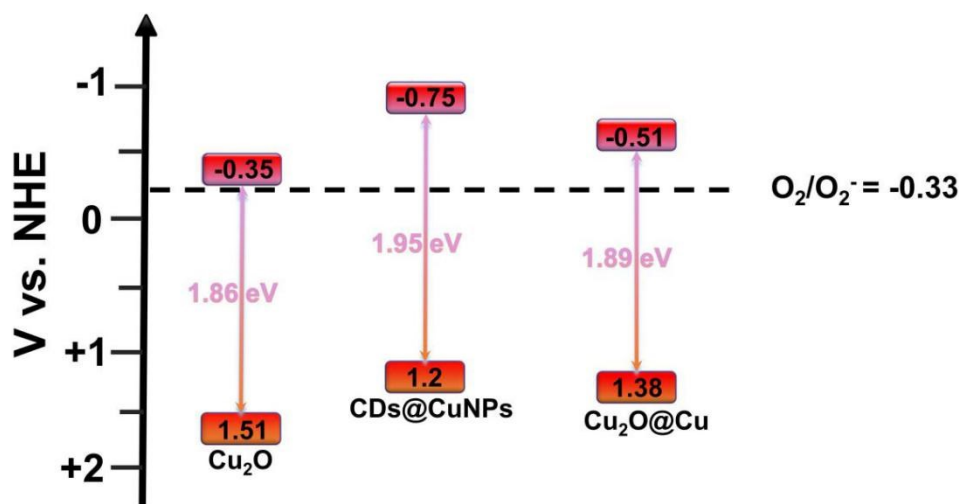

**Figure S17.** Diagram of the energy band positions of  $\text{Cu}_2\text{O}$ ,  $\text{CDs@CuNPs}$  and  $\text{Cu}_2\text{O@Cu}$ .

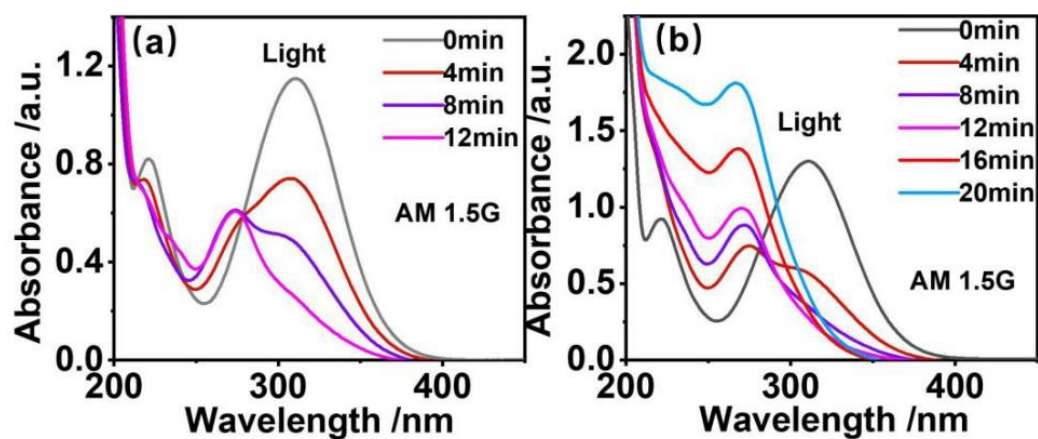

**Figure S18.** UV-Vis absorption spectra of 4-NS vs. time in the presence of  $\text{CDs@CuNPs}$  and AB under simulated AM 1.5G solar light (a) and adding EDTA-2Na hole scavenger (b).

Table S1. Catalytic hydrogenation of nitrostyrene with different catalysts

| Catalyst                                                           | Reductant                                       | Pressure<br>(bar) | T (K) | Time<br>(min) | Selectivity<br>(%) | Conversion<br>(%) |
|--------------------------------------------------------------------|-------------------------------------------------|-------------------|-------|---------------|--------------------|-------------------|
| CDs@CuNPs                                                          | AB                                              | /                 | 298   | 20            | >99                | 100               |
| Cu <sub>2</sub> O                                                  | AB                                              | /                 | 298   | 12            | 0                  | 0                 |
| Cu <sub>2</sub> O@Cu                                               | AB                                              | /                 | 298   | 12            | 0                  | 0                 |
| Au/TiO <sub>2</sub> <sup>2</sup>                                   | H <sub>2</sub>                                  | 9                 | 393   | 360           | 95.9               | 98.5              |
| Au/Fe <sub>2</sub> O <sub>3</sub> <sup>2</sup>                     | H <sub>2</sub>                                  | 12                | 403   | 570           | 95.1               | 95.2              |
| Pd/C <sup>2</sup>                                                  | H <sub>2</sub>                                  | 9                 | 393   | 1.8           | 0                  | 99                |
| Pt/C <sup>2</sup>                                                  | H <sub>2</sub>                                  | 9                 | 393   | 1.8           | 2.9                | 96.7              |
| Au-Pd/TiO <sub>2</sub> <sup>2</sup>                                | H <sub>2</sub>                                  | 9                 | 393   | 1.8           | 0                  | 99.5              |
| Au-Pt/TiO <sub>2</sub> <sup>2</sup>                                | H <sub>2</sub>                                  | 9                 | 393   | 1.2           | 1.8                | 93.0              |
| Co@CN <sup>3</sup>                                                 | N <sub>2</sub> H <sub>4</sub> ·H <sub>2</sub> O | /                 | 353   | 90            | 95                 | 100               |
| Co-NC <sup>3</sup>                                                 | N <sub>2</sub> H <sub>4</sub> ·H <sub>2</sub> O | /                 | 353   | 90            | 79                 | 97                |
| Co@NC(al) <sup>3</sup>                                             | N <sub>2</sub> H <sub>4</sub> ·H <sub>2</sub> O | /                 | 353   | 90            | 99                 | 74                |
| Pd-Pd <sub>3</sub> Bi/SiO <sub>2</sub> <sup>4</sup>                | Methanol                                        | /                 | 343   | 60            | 10                 | 43                |
| Rh-RhPb/SiO <sub>2</sub> <sup>4</sup>                              | Methanol                                        | /                 | 343   | 60            | 94                 | 38                |
| Rh-RhPb <sub>2</sub> /SiO <sub>2</sub> <sup>4</sup>                | Methanol                                        | /                 | 343   | 60            | 93                 | 94                |
| Pd <sub>13</sub> Ga <sub>5</sub> -Pd/SiO <sub>2</sub> <sup>4</sup> | Methanol                                        | /                 | 343   | 60            | 0                  | 22                |
| 0.75%Pt/FeO <sub>x</sub> -R250 <sup>5</sup>                        | H <sub>2</sub>                                  | 3                 | 313   | 73            | 73                 | 96.7              |
| 2.73%Pt/FeO <sub>x</sub> -R250 <sup>5</sup>                        | H <sub>2</sub>                                  | 3                 | 313   | 110           | 92.9               | 97.8              |
| 4.30%Pt/FeO <sub>x</sub> -R250 <sup>5</sup>                        | H <sub>2</sub>                                  | 3                 | 313   | 34            | 92.7               | 94.2              |
| 0.2%Pt/TiO <sub>2</sub> -R450 <sup>5</sup>                         | H <sub>2</sub>                                  | 3                 | 313   | 840           | 94.0               | 96.8              |
| 0.08%Pt/SiO <sub>2</sub> <sup>5</sup>                              | H <sub>2</sub>                                  | 3                 | 313   | 65            | 46.9               | 87.9              |
| 0.08%Pt/Al <sub>2</sub> O <sub>3</sub> <sup>5</sup>                | H <sub>2</sub>                                  | 3                 | 313   | 158           | 27.8               | 87.3              |
| (MeCp)0.04PtH/Zn/SiO <sub>2</sub> <sup>6</sup>                     | H <sub>2</sub>                                  | 3.4               | 313   | 1440          | 79                 | 46                |
| (MeCp)0.08PtH/Zn/SiO <sub>2</sub> <sup>6</sup>                     | H <sub>2</sub>                                  | 3.4               | 313   | 1440          | 75                 | 67                |

## References

1. X. Meng, Q. Chang, C. Xue, J. Yang and S. Hu, *Chem. Commun.*, 2017, **53**, 3074-3077.
2. A. C. a. P. Serna, *Science*, 2006, **313**, 332-334.
3. S. Chen, L.-L. Ling, S.-F. Jiang and H. Jiang, *Green Chem.*, 2020, **22**, 5730-5741.
4. S. Furukawa, Y. Yoshida and T. Komatsu, *ACS Catal.*, 2014, **4**, 1441-1450.
5. H. Wei, X. Liu, A. Wang, L. Zhang, B. Qiao, X. Yang, Y. Huang, S. Miao, J. Liu and T. Zhang, *Nat. Commun.*, 2014, **5**, 5634.
6. J. Camacho-Bunquin, M. Ferrandon, H. Sohn, D. Yang, C. Liu, P. A. Ignacio-de Leon, F. A. Perras, M. Pruski, P. C. Stair and M. Delferro, *J. Am. Chem. Soc.*, 2018, **140**, 3940-3951.
